# Supplementary material for: Phenotypic evolution through variation in splicing of the noncoding RNA COOLAIR
Source: PubMed Central journal article supplement (PMC4387712; doi:10.1101/gad.258814.115), 2015-04-01

**Supplemental Figure Legends:**

**Supplemental Fig. S1.** RT-PCR analysis on *COOLAIR* class II alternative splicing in SNP259 transgenic lines and natural accessions. The position of PCR primers F3 and R1 are indicated in Figure 1B.

**Supplemental Fig. S2.** Influence of SNP259 polymorphism on *COOLAIR* class II alternative splicing. Comparison of the alternative splicing profiles of *COOLAIR* class II between *FLC* transgenic plants with reciprocal SNP259 mutations in Col-0 (A) and Var2-6 (B) *FLC* backgrounds. Each boxplot shows the qPCR data of 10 randomly selected independent transgenic plants for each construct. Primers F2 and R3 are indicated in (Fig. 1B).

**Supplemental Fig. S3.** *COOLAIR* is knocked down in Col-TEX transgenic lines. (A) Schematic illustration of *FLC* and representative *COOLAIR* variants and the position of primers for proximal and distal *COOLAIR* variants. The quantitative PCR primers for proximal *COOLAIR*, F1: 5`-TGGTTGTTATTTGGTGGTGTG-3` and R5: 5`-CTTCTGCTCCCACATGATGA-3`. Primers for distal *COOLAIR*, F3: 5`-GTATCTCCGGCGACTTGAAC-3` and R6: 5`-GGATGCGTCACAGAGAACAG-3`. (B) *COOLAIR* class I variants were knocked down in Col-TEX transgenic lines compared Col lines. (C) *COOLAIR* class II variants were knocked down in Col-TEX transgenic lines compared with Col lines.

**Supplemental Fig. S4.** The flowering time of Col-TEX/*FRI flc-2* and Col-TEX-G259T/*FRI flc-2* did not show significant difference. 27 independent transgenic lines and 20 independent transgenic lines were analysed; in each line, 8 individuals were

assayed. The Kolmogorov-Smirnov test indicated the flowering time difference between Col-TEX/*FRI flc-2* and Col-TEX-G259T/*FRI flc-2* plants is not significant (NS, P=0.426).

**Supplemental Fig. S5** Comparison of *FLC* expression after series of vernalization in representative transgenic plants. NV means non-vernalization, T0 means during cold and T10 means 10 days after cold. Values are means +/- S.D from 3 biological repeats.

**Supplemental Fig. S6.** Illustration of the method for *FLC* RNA 5' capping analysis. Solid black lines: RNA; Red line: RNA adaptor; Red cross: the RNA ligation does not work because of the 5' cap at RNA end.

**Supplemental Fig. S7.** Histone modification analysis at *FLC* locus in representative transgenic lines Var/*FRI flc-2* and Var-T259G/*FRI flc-2*. **(A)** ChIP analysis of H3K27me3. **(B)** ChIP analysis of H3K36me3. Only the 5' part of the *FLC* locus is analyzed due to background from *FLC* gene remnants left in the *flc-2* fast-neutron-induced mutant. *STM* and *ACTIN* are the internal controls for ChIP experiments. Values are means +/- S.D from 3 biological repeats.

GENESDEV/2015/258814  
Li\_Supplemental Fig. S1

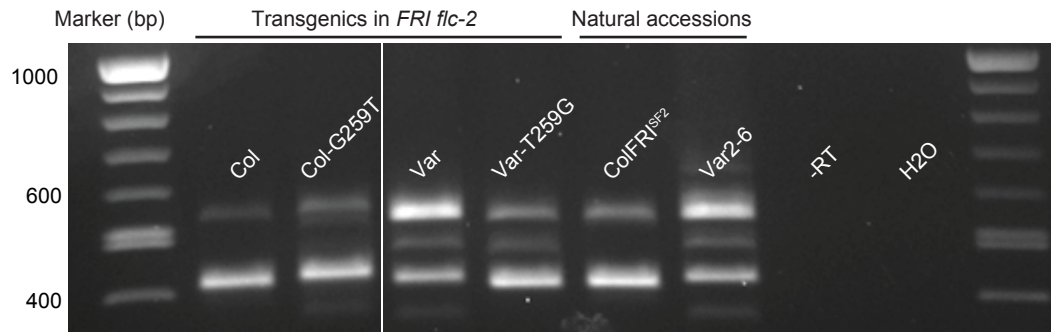

Li\_Supplemental Fig. S2

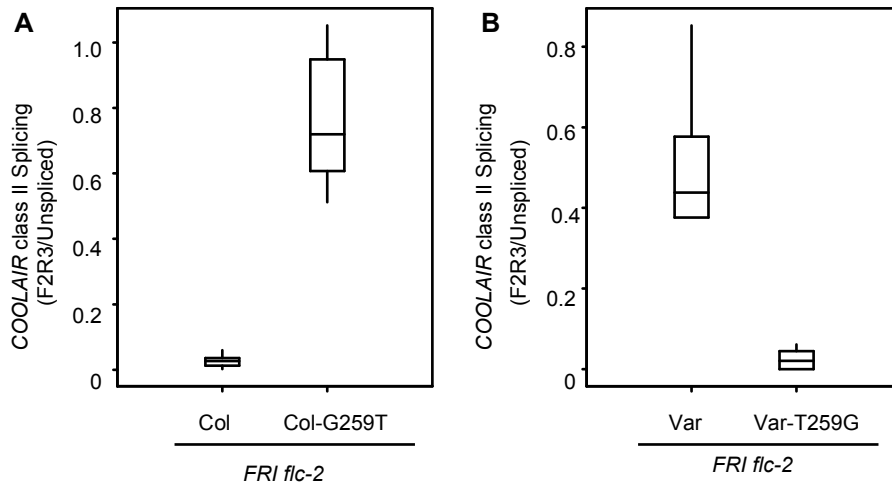

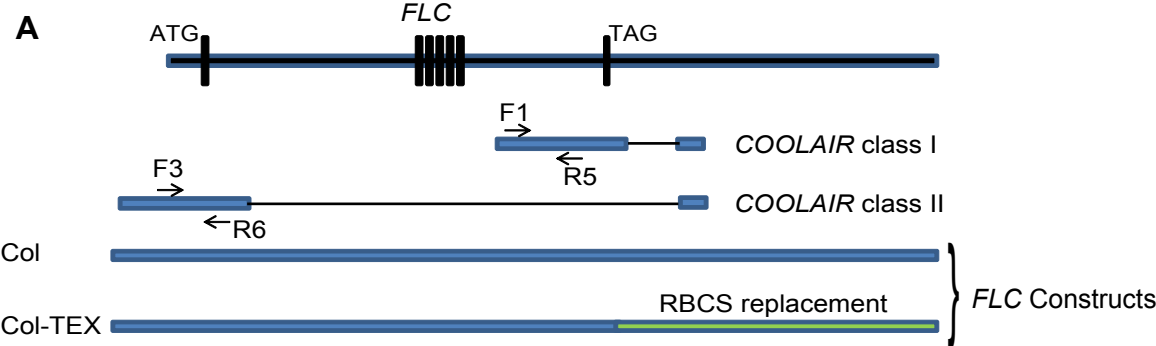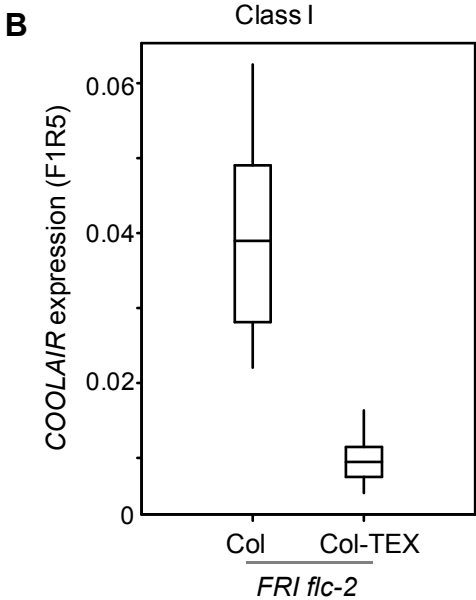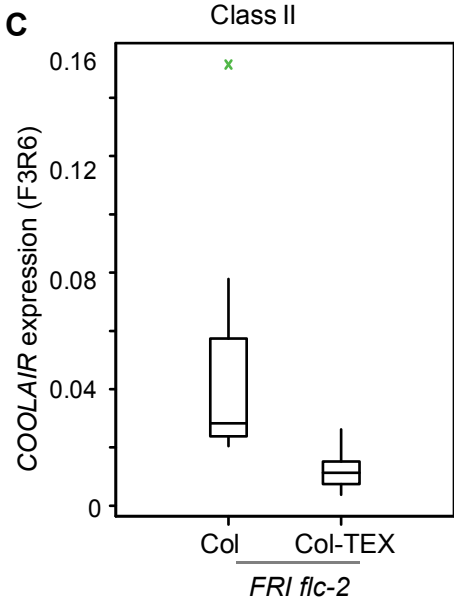

GENESDEV/2015/258814  
Li\_supplemental Fig. S4

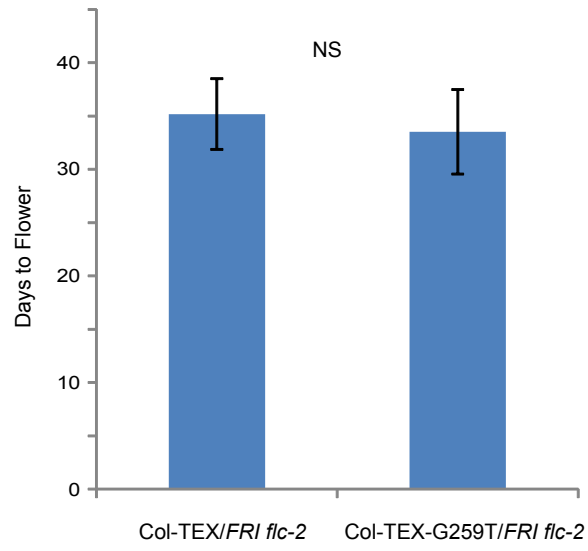

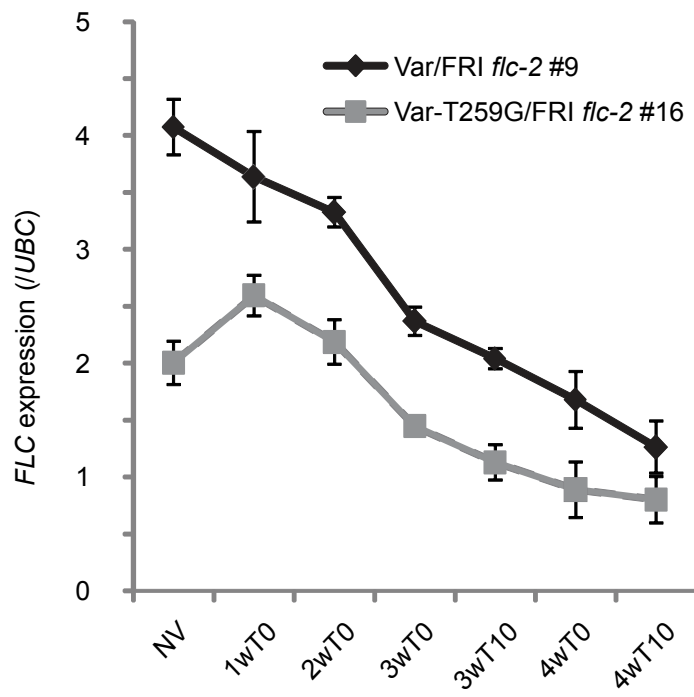

GENESDEV/2015/258814  
Li\_Supplemental Fig. S6

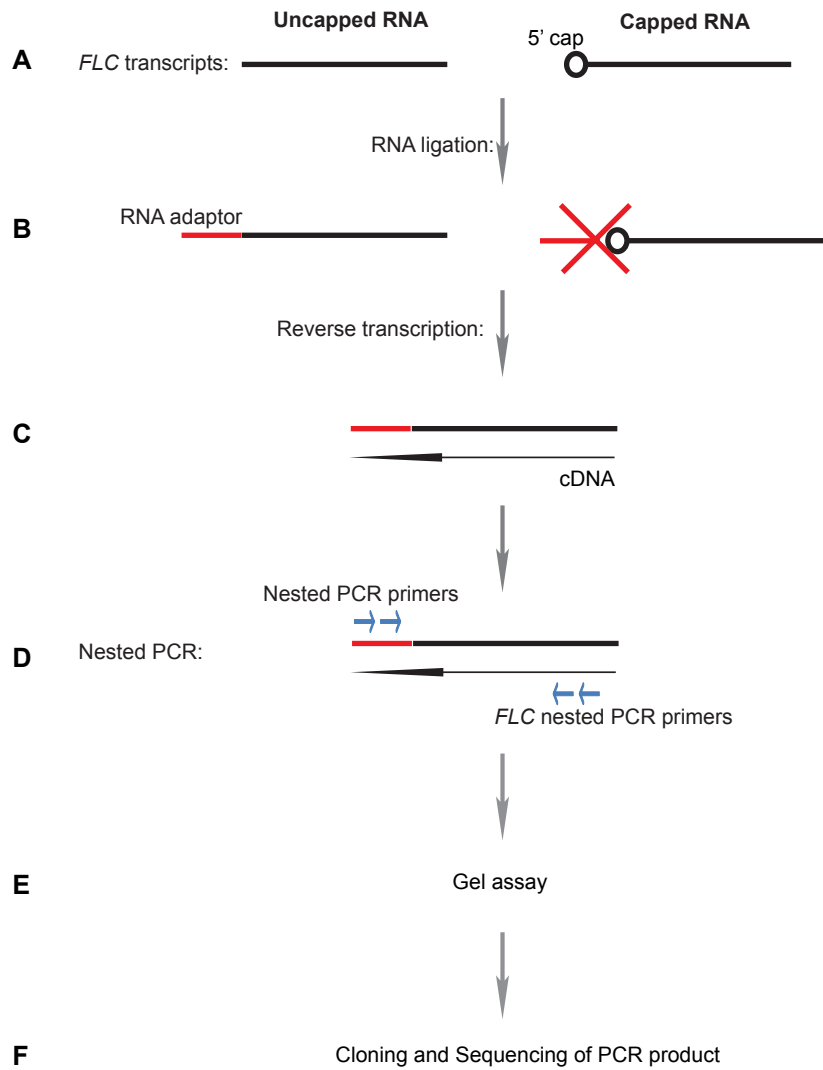



GENESDEV/2015/258814  
Li\_Supplemental Fig. S7

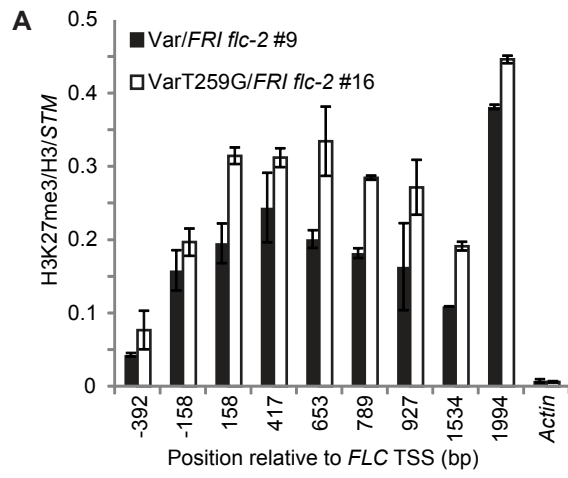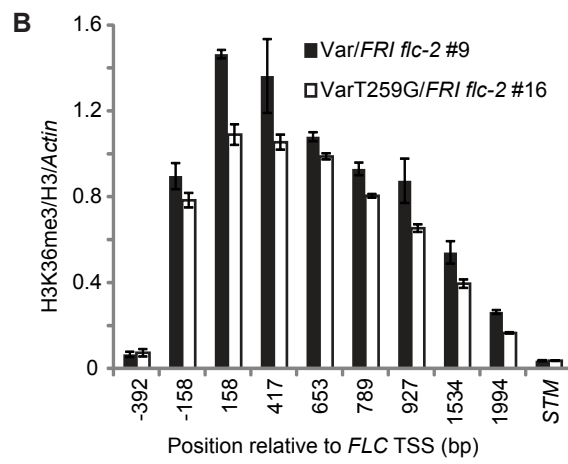

Supplement: supp_gad.258814.115_Supplemental_Figures_and_Legends.pdf [file supp_gad.258814.115_Supplemental_Figures_and_Legends.pdf]
